# Supplementary material for: Significantly improved black phase stability of FAPbI3 nanowires via spatially confined vapor phase growth in nanoporous templates
Source: Royal Society of Chemistry journal article supplement (doi:10.1039/c8nr03058h), 2018-01-01
Supplement: c8nr03058h1.pdf [file c8nr03058h1.pdf]

## Supporting information

# Significantly Improved Black Phase Stability of FAPbI<sub>3</sub> Nanowires via Spatially Confined Vapor Phase Growth in Nanoporous Templates

*LeiLei Gu<sup>†,§</sup>, Daquan Zhang<sup>†,§</sup>, Matthew Kam<sup>†</sup>, Qianpeng Zhang<sup>†</sup>, Swapnadeep Poddar<sup>†</sup>, Yu Fu<sup>†</sup>,  
Xiaoliang Mo<sup>‡</sup>, Zhiyong Fan<sup>†,\*</sup>*

§ These authors contribute equally to this work

† Department of Electronic and Computer Engineering, The Hong Kong University of Science and Technology, Clear Water Bay, Kowloon, Hong Kong SAR, China.

‡ Department of Materials Science, Fudan University, Shanghai 200433, China.

\* Corresponding email: eezfan@ust.hk

**Top-view SEM image of FAPbI<sub>3</sub> NWs/PAM sample**

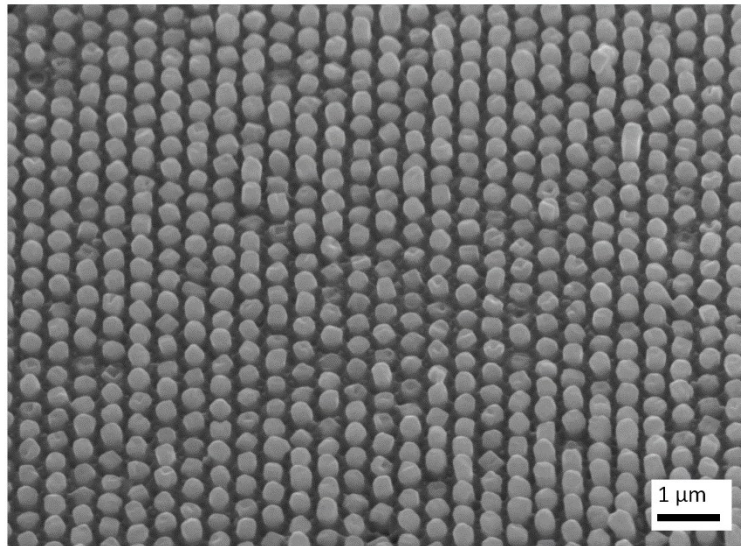

**Figure S1.** Top view of an ordered NW/PAM sample with minor overgrowth.

### Light absorption of NWs/PAM samples grown at different temperature

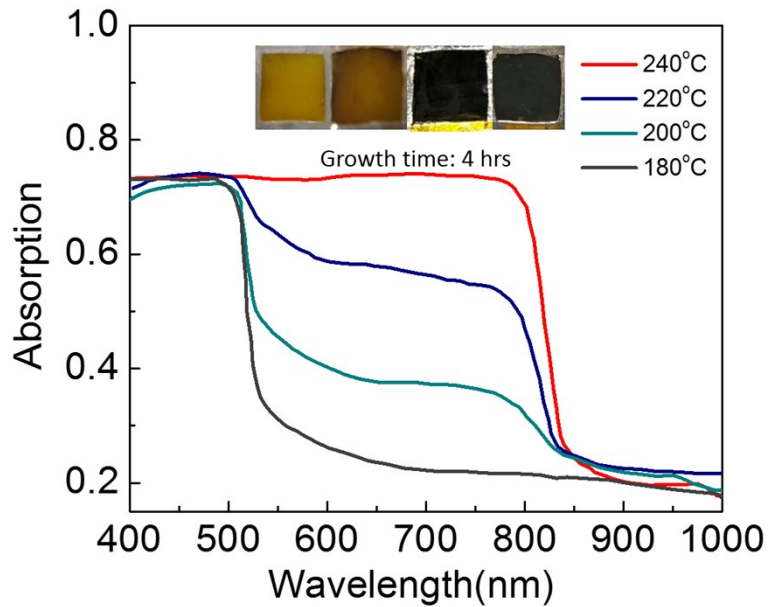

**Figure S2.** UV-Vis spectrum of NWs/PAM samples grown at different temperature (180 °C-240 °C) for 4 hrs.

**MAPbI<sub>3</sub> NWs grown with CVD for comparison**

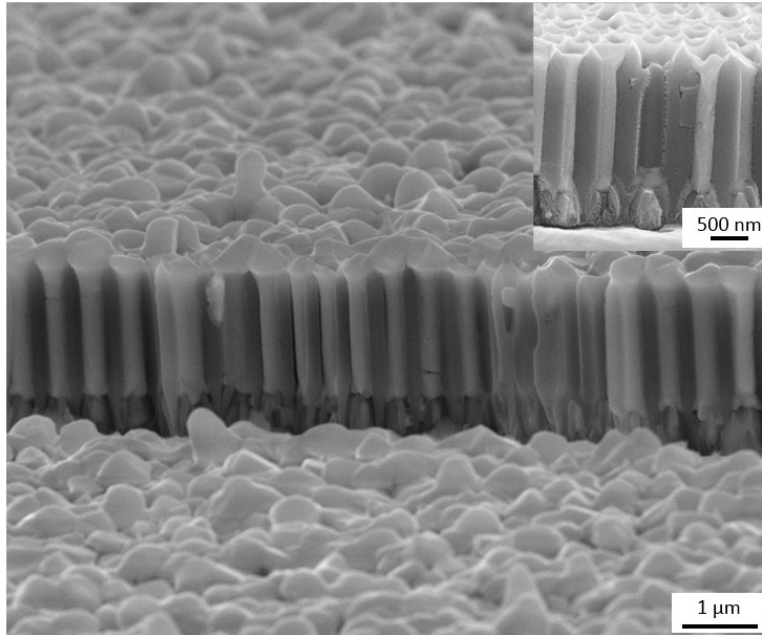

**Figure S3.** Cross-section view SEM images of MAPbI<sub>3</sub> NWs grown with CVD method at temperature of 180 °C.

### Thermal stability comparison of FAPbI<sub>3</sub> NWs/PAM sample

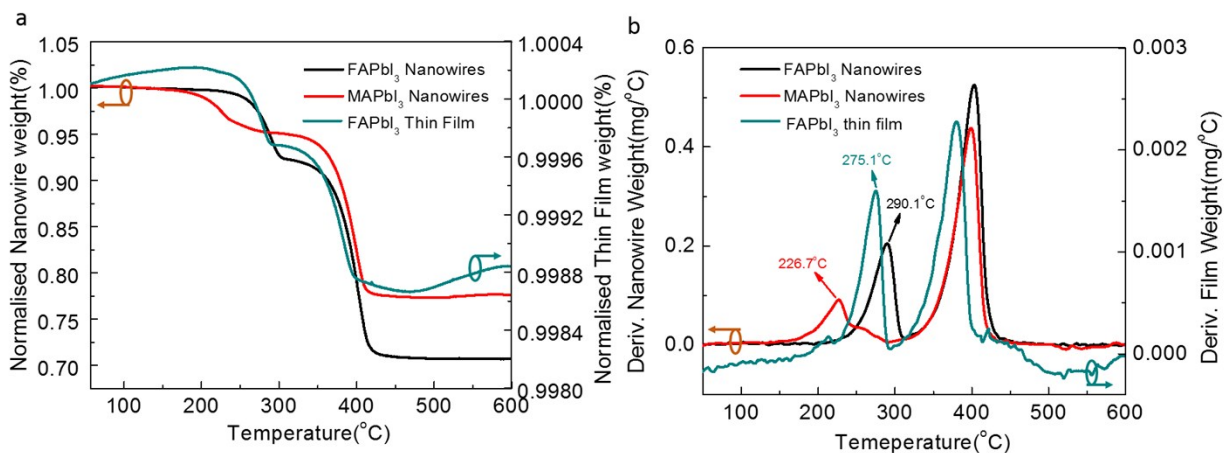

**Figure S4.** TGA analysis of FAPbI<sub>3</sub> NWs/PAM, MAPbI<sub>3</sub> NWs/PAM and FAPbI<sub>3</sub> film samples (a) and their corresponding 1st derivatives (b).

## Stability analysis of FAPbI<sub>3</sub> NWs/PAM sample

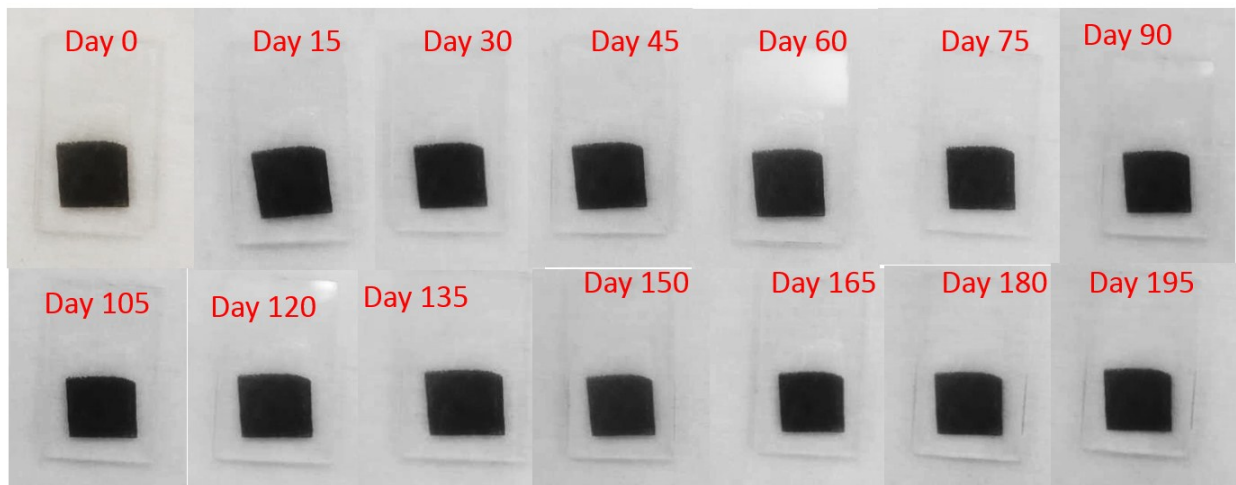

**Figure S5.** Optical photos of FAPbI<sub>3</sub> NWs/PAM sample stored in ambient condition with Relative humidity ranging from 18%-40% vs time.

## Morphology of FAPbI<sub>3</sub> film

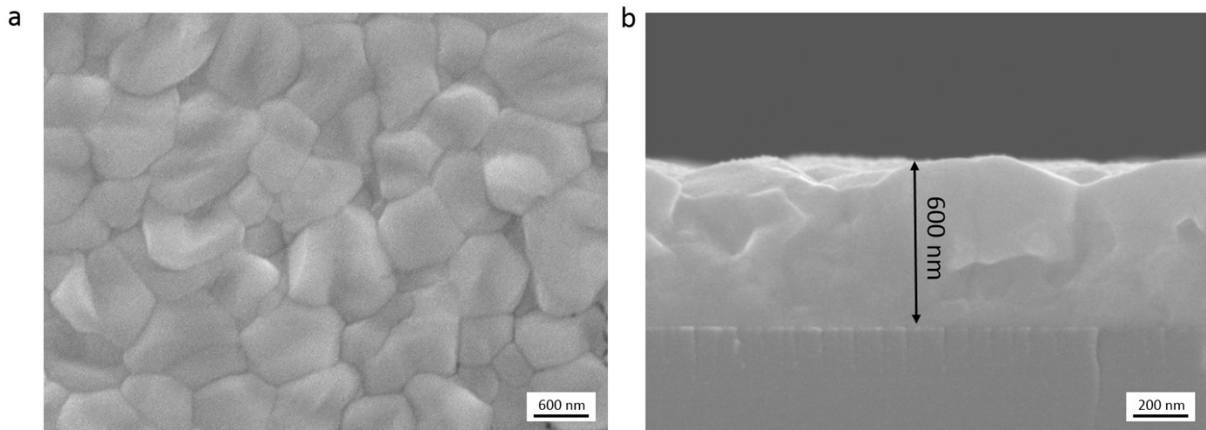

**Figure S6.** SEM images of evaporated FAPbI<sub>3</sub> film on FTO substrate in top (a) and cross-section view (b).

## Stability analysis of FAPbI<sub>3</sub> film

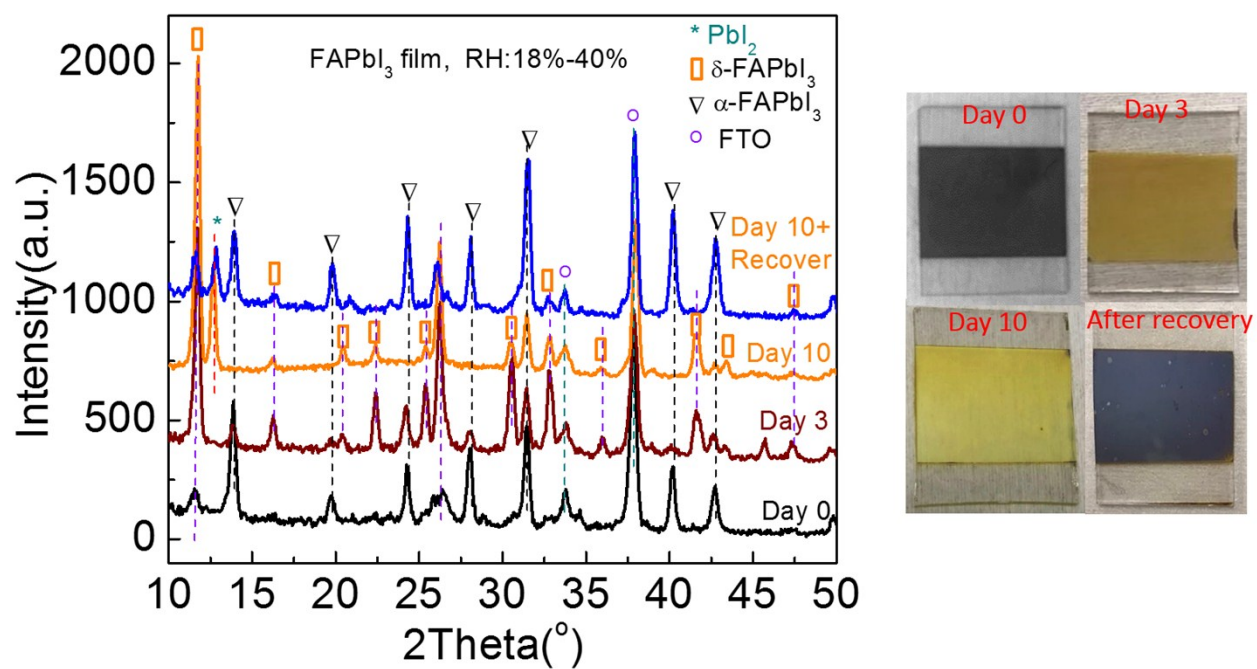

**Figure S7.** XRD evolution of FAPbI<sub>3</sub> film stored in ambient condition with Relative humidity range from 18%-40% vs time and the corresponding photos.



## Chlorobenzene test of $\alpha$ -FAPbI<sub>3</sub> film

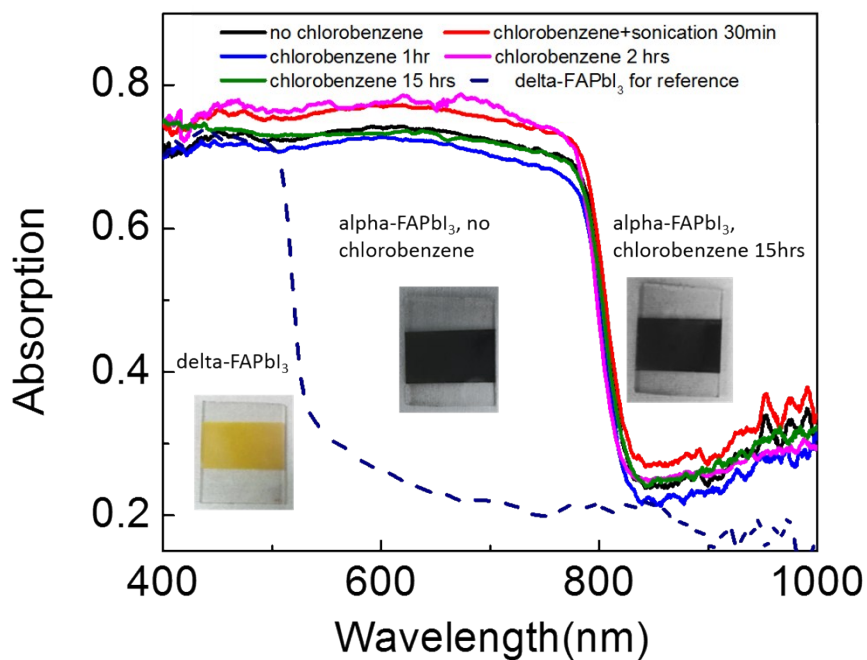

**Figure S8.** UV-vis spectrums and photos of evaporated FAPbI<sub>3</sub> film in chlorobenzene at different condition: (a) 30 min chlorobenzene+sonication; (b) 1hr min chlorobenzene; (c) 2hrs chlorobenzene; (d) 15 hrs chlorobenzene.

**Stability analysis of FAPbI<sub>3</sub> NWs/PAM in ambient with RH 97%**

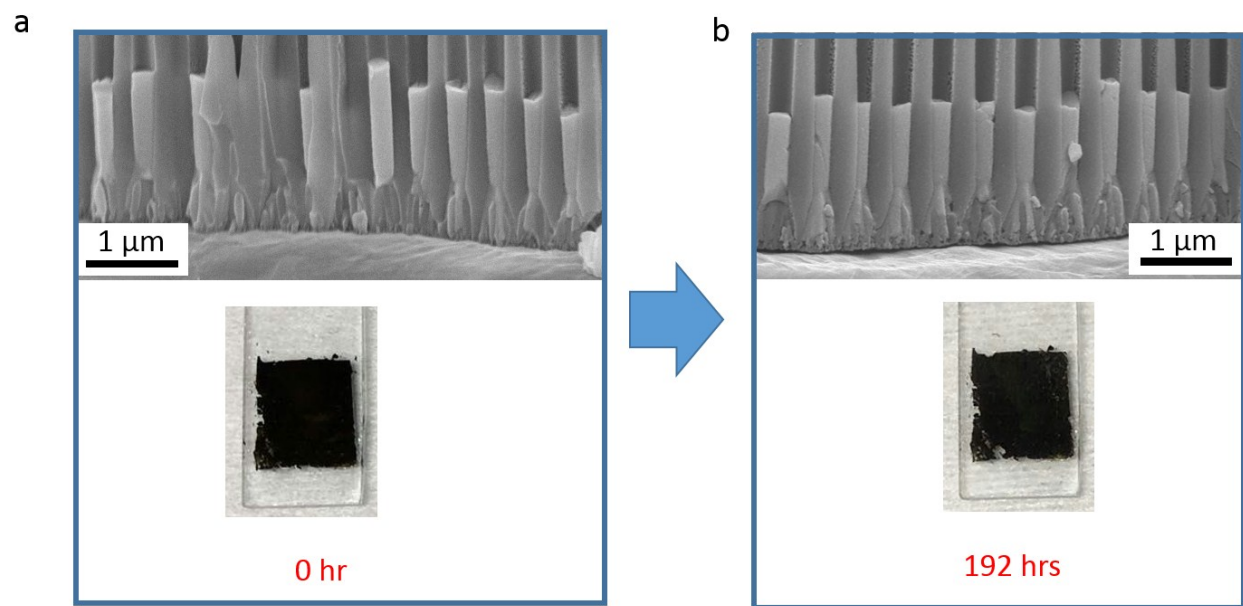

Figure S9. SEM image and Photo of FAPbI<sub>3</sub> NWs/PAM before (a) and after aging in RH 97% environment for 192 hrs (b).

## Comparison of phase stability of our FAPbI<sub>3</sub> NWs/PAM sample with others

|                                                        | Morphology           | Storage environment | $\alpha$ -phase stable time | Reference          |
|--------------------------------------------------------|----------------------|---------------------|-----------------------------|--------------------|
| FAPbI <sub>3</sub>                                     | NWs in PAM           | Air, RH: 18~40%     | >210 days                   | Our sample         |
| FAPbI <sub>3</sub>                                     | Polycrystalline film | Air, RH: 97%        | >192 hrs                    | Our control sample |
| FAPbI <sub>3</sub>                                     | Polycrystalline film | Air, RH: 18~40%     | 3 days                      | Ref 20             |
| FAPbI <sub>3</sub>                                     | Polycrystalline film | Air, RH: 50%        | 5 min                       | Ref 38             |
| FAPbI <sub>3</sub>                                     | Polycrystalline film | Inert gas           | 10 min                      | Ref 23             |
| FAPbI <sub>3</sub>                                     | Polycrystalline film | Air, RH:90%         | 4 hrs                       | Ref 47             |
| FAPbI <sub>3</sub>                                     | Polycrystalline film | Air, RH:50%         | < 5 days                    | Ref 38             |
| FAPbI <sub>3</sub>                                     | Single crystals      | Inert gas           | 24 hrs                      | Ref 39             |
| FAPbI <sub>3</sub>                                     | Single crystals      | Inert gas           | 10 days                     | Ref S1             |
| FAPbI <sub>3</sub>                                     | Single crystals      | Air, RH: 40-50%     | 7 days                      |                    |
| FAPbI <sub>3</sub>                                     | surface modified NWs | Air, RH: 15-20%     | >23 days                    |                    |
| FAPbI <sub>3</sub>                                     | surface modified NWs | ambient             | >4 months                   | Ref 25             |
| FA <sub>0.85</sub> CS <sub>0.15</sub> PbI <sub>3</sub> | Polycrystalline film | Air, RH:15%         | 30 days                     | Ref 23             |
| FAPb <sub>0.95</sub> Bi <sub>0.05</sub> I <sub>3</sub> | Polycrystalline film | Air, RH: 50%        | >15 days                    | Ref S2             |

Table 1. Comparison of  $\alpha$  -phase stable time of our FAPbI<sub>3</sub> NWs/PAM sample with reported values.

### Reference

S1. Liu, Y.; Sun, J.; Yang, Z.; Yang, D.; Ren, X.; Xu, H.; Liu, S. F. *Adv. Opt. Mater.* **2016**, 4, (11), 1829-1837.

S2. Hu, Y.; Qiu, T.; Bai, F.; Miao, X.; Zhang, S. *J. Mater. Chem. A* **2017**, 5, (48), 25258-25265.

### Phase stability of large-diameter alpha-FAPbI<sub>3</sub> NWs in AAM

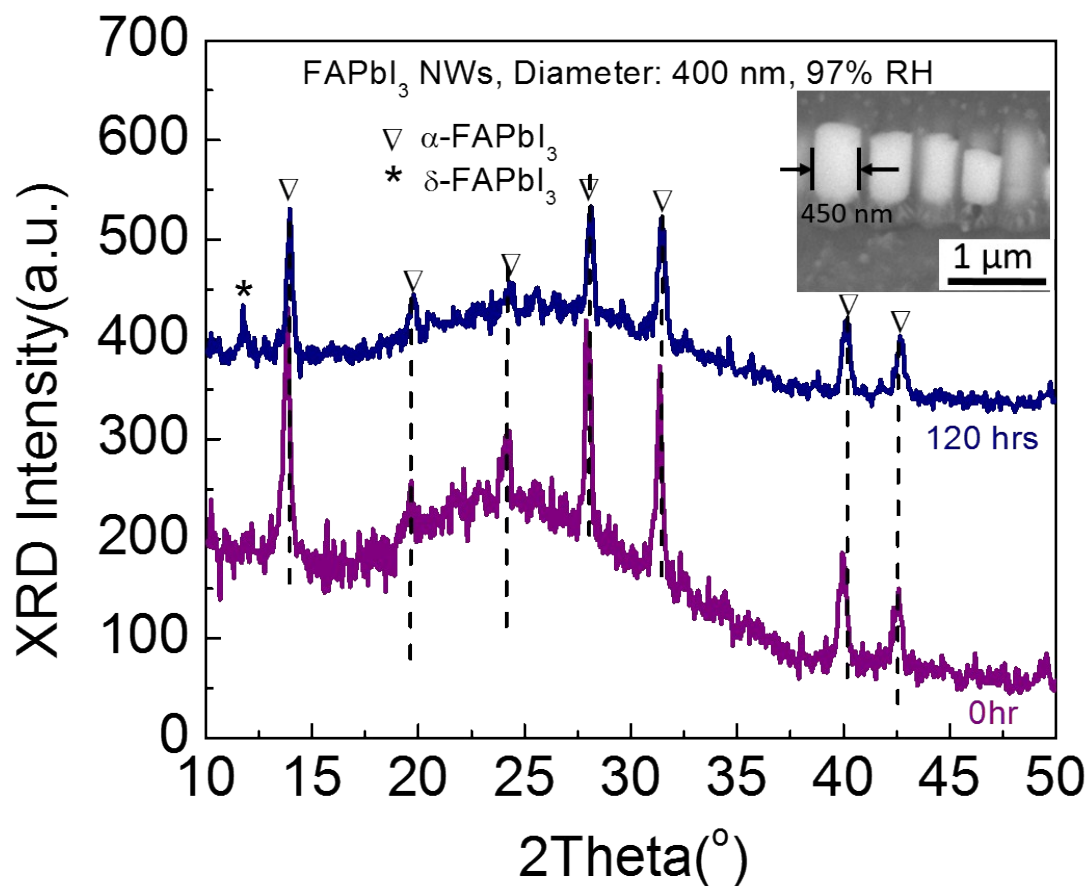

**Figure S10.** XRD of large-diameter FAPbI<sub>3</sub> NWs (~450 nm) in freestanding PAM stored at wet condition (temperature: 23 °C, Relative humidity: 97%) vs time.

### Optical properties stability of FAPbI<sub>3</sub> NWs/PAM sample

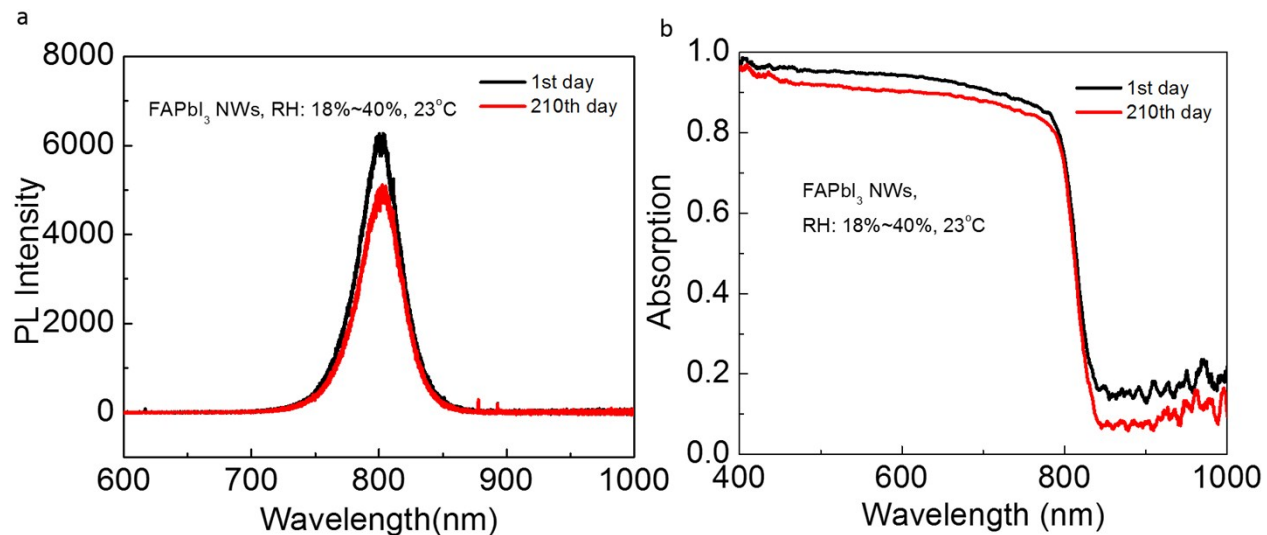

**Figure S11.** PL (a) and UV-vis (b) curves of FAPbI<sub>3</sub> NWs/PAM sample before and after storing in ambient condition with relative humidity range from 18%-40% for 210 days.
